# Supplementary material for: PtPd nanoframes derived from Pd@PdPt core–shell rhombic dodecahedrals with excellent catalytic performance toward methanol oxidation
Source: Royal Society of Chemistry journal article supplement (doi:10.1039/d1qi00081k), 2021-01-01
Supplement: d1qi00081k1.pdf [file d1qi00081k1.pdf]

## **Supporting Information**

### **PtPd Nanoframes Derived from Pd@PdPt Core-Shell Rhombic Dodecahedrals with Excellent Catalytic Performance toward Methanol Oxidation**

Yangyang Ren, Chuanliang Li, Baosong Li, Fan Gao, Xinghua Zhang, Xiaojing Yang, Lanlan Li,  
Zunming Lu, Xiaofei Yu\*

### Determination of d-band center.

The d-band centers are obtained from the XPS valence band spectrum and the data ranging from 0 to -9 eV are imported into XPS peak software to create a baseline. Then, the d-band centers are calculated by the following equation:

$$\int N(\epsilon)\epsilon d\epsilon / \int N(\epsilon) d\epsilon$$

where  $N(\epsilon)$  is the density of states (i. e. the photoelectron intensity after subtracting the background).<sup>29</sup>

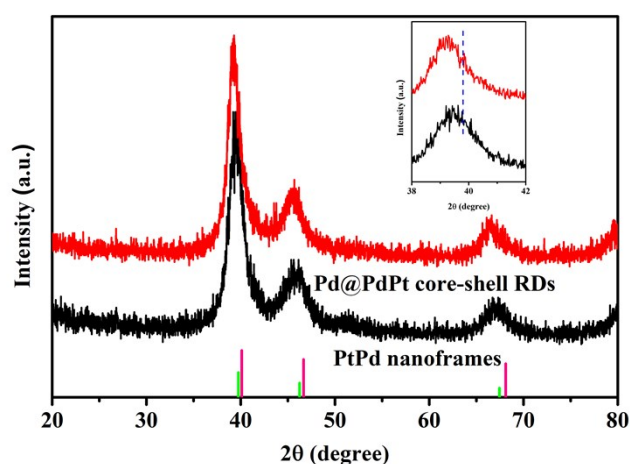

**Fig. S1** XRD patterns of Pd@PdPt core-shell RDs and PtPd nanoframes. The inset shows the clear shift of the (111) peaks of Pd@PdPt core-shell RDs and PtPd nanoframes. Besides, the peak of PtPd nanoframes has a positive shift compared with that of Pd@PdPt core-shell RDs.

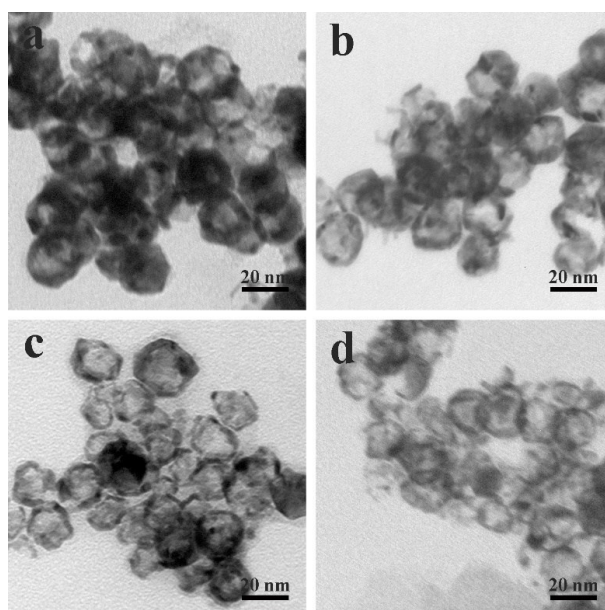

**Fig. S2** TEM images obtained with different use of  $\text{FeCl}_3 \cdot 6\text{H}_2\text{O}$ : (a) 20 mg; (b) 35 mg; (c) 65 mg and (d) 80 mg.

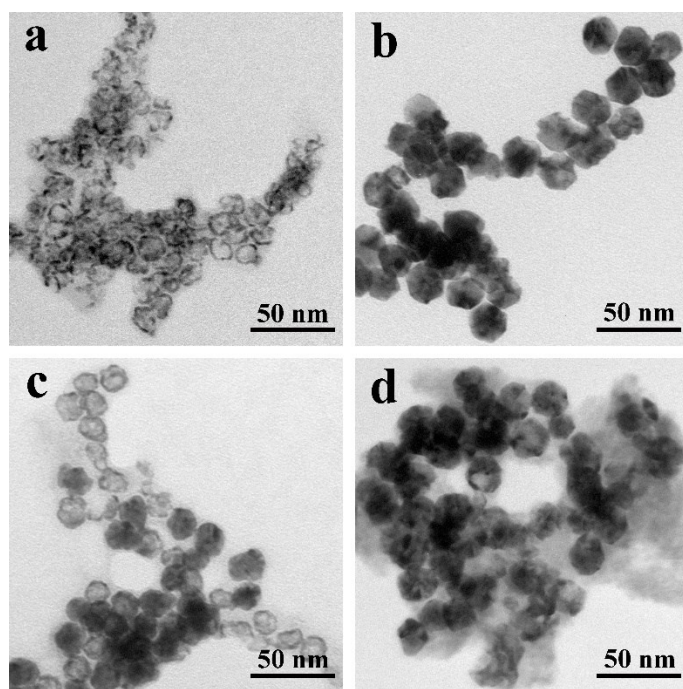

**Fig. S3** TEM images obtained with different etching agents: (a)  $\text{FeCl}_3 \cdot 6\text{H}_2\text{O} + \text{HNO}_3$ ; (b)  $\text{ZnCl}_2 + \text{HCl}$ ; (c)  $\text{Fe}(\text{NO}_3)_3 \cdot 9\text{H}_2\text{O} + \text{HCl}$  and (d)  $\text{FeCl}_3 \cdot 6\text{H}_2\text{O}$ .

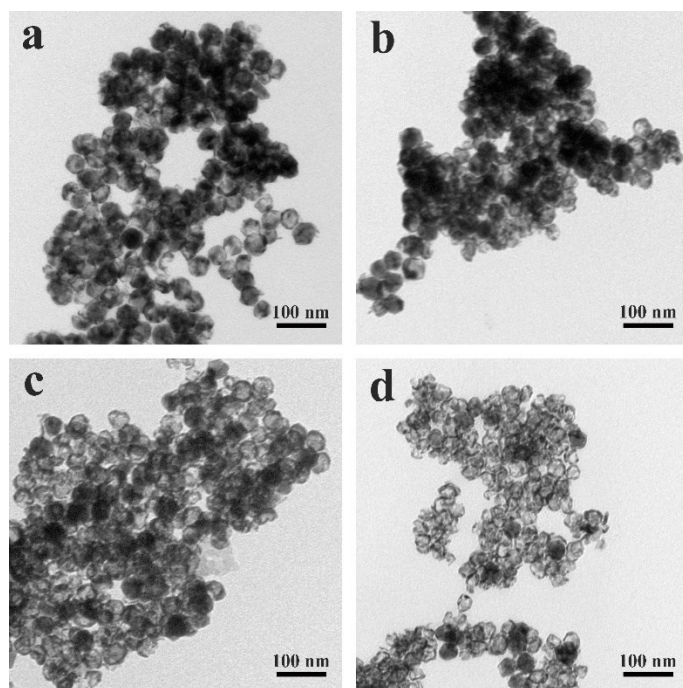

**Fig. S4** TEM images obtained at different etching time: (a) 0.5 h; (b) 1 h; (c) 1.5 h and (d) 2 h.

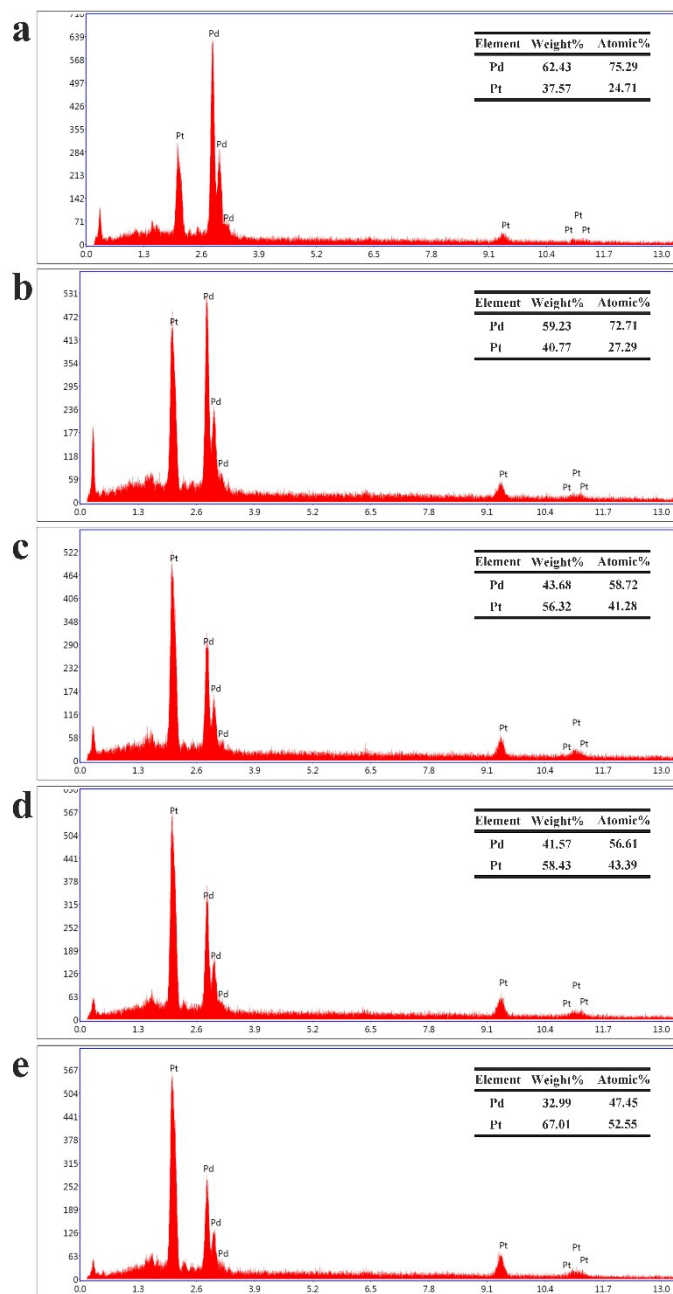

**Fig. S5** EDS results obtained at different etching time: (a) 0 h; (b) 0.5 h; (c) 1 h; (d) 1.5 h and (e) 2 h.

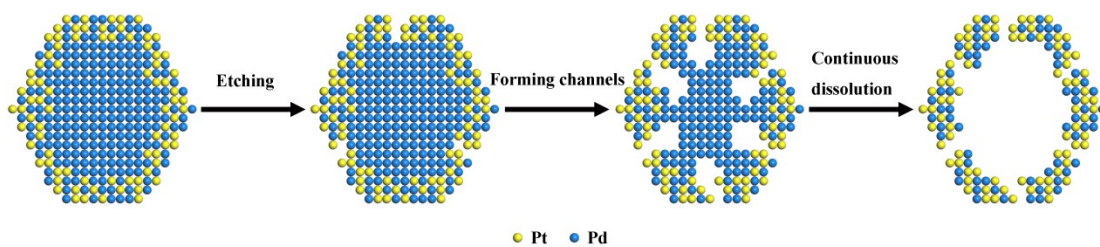

**Fig. S6** The formation mechanism of PtPd nanoframes.

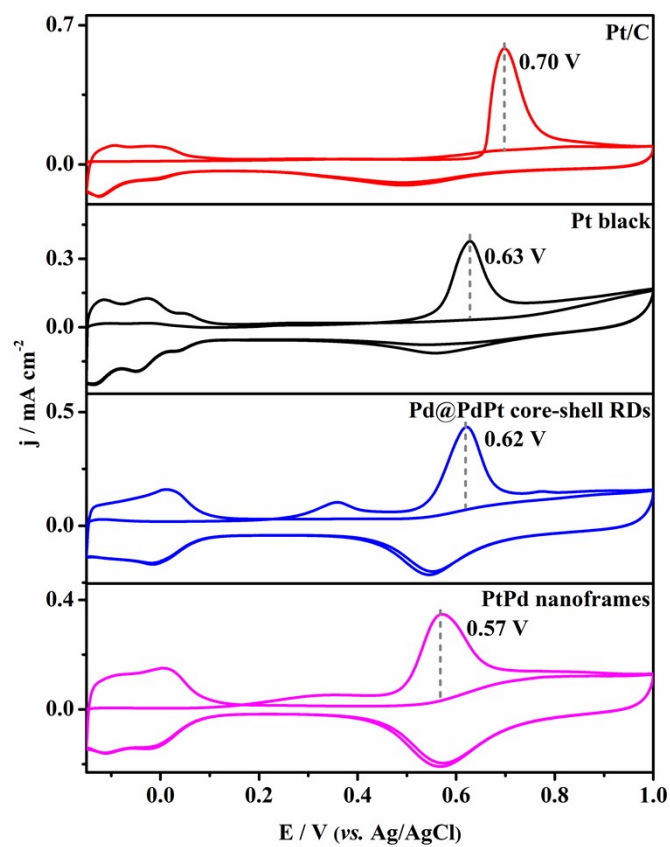

**Fig. S7** CO-stripping curves of Pt/C, Pt black, Pd@PdPt core-shell RDs and PtPd nanoframes in 0.5 M H<sub>2</sub>SO<sub>4</sub>.
